# Supplementary material
Source: publisher figshare collection journal article supplement (https://gsajournals.figshare.com/ndownloader/files/22811840)
Supplement: Supplementary file 1 [file 22811840]

## Sheet: Sheet1
Table S3 Transgenes and alleles
Designation	Description	Comments	Full Designation	Reference
bqSi711 IV	mex-5p FLP D5 sl2 mNeonGreen	Integrated at cxTi10882. Available at CGC.		Macías-León and Askjaer, 2018
bqSi640 II	dpy-7p FRT mCherry-his-58 FRT GFP-his-58 unc-119(+)	Integrated at ttTi5605. Available at CGC.		Muñoz-Jiménez et al. 2017
e1489 IV	him-8 allele	Available at CGC.	him-8(e1489)	Hodgkin et al. 1979.
js1499 II	dpy-7p FRT GFP-his-58 unc-119(+)	FLP excision of Cherry-his-58 cassette from bqSi640	bqSi640 js1499	this study
jsTi1453 I	mosL loxP rpl-28 FRT GFP-hIs-58 FRT3 mosR	miniMos insertion of plasmid NM3646 on Chr I: 11,933,068. m.u. 13.1		this study
jsSi1481 I	phat-5p mCherry V2A ANF-Emerald	RMCE insertion of NM3657 into jsTi1453	jsTi1453 jsSi1481	this study
jsSi1482 I	phat-5p mCherry V2A ANF-Emerald	RMCE insertion of NM3657 into jsTi1453	jsTi1453 jsSi1482	this study
jsTi1485 II	phat-5p rtetR-QF::P2A::mKate::T2A::tetR-pie1	miniMos insertion of NM3681 on Chr II :13,472,342.		this study
jsSi1486 I	phat-5p mCherry V2A GFP-rab-3	RMCE insertion of NM3656 into jsTi1453	jsTi1543 jsSi1486	this study
jsSi1487 I	tetO 7X ∆pes-10p mCherry V2A GFP-rab-3	RMCE insertion of NM3684 into jsTi1453	jsTi1543 jsSi1487	this study
jsSi1488 I	tetO 7X ∆pes-10p mCherry V2A GFP-rab-3	RMCE insertion of NM3684 into jsTi1453	jsTi1543 jsSi1488	this study
jsSi1489 I	tetO 7X ∆pes-10p mCherry V2A GFP-rab-3	RMCE insertion of NM3684 into jsTi1453	jsTi1543 jsSi1489	this study
jsSi1490 IV	mosL loxP mex-5p FLP sl2 mNeonGreen rpl-28 FRT GFP-HIs-58 FRT3 mosR	miniMos insertion of plasmid NM3689 on Chr IV: 7,310,985. m.u. 3.32		this study
jsTi1492 II	mosL loxP mex-5p FLP sl2 mNeonGreen rpl-28 FRT GFP-HIs-58 FRT3 mosR	miniMos insertion of plasmid NM3689 on Chr II: 3,158,995. mu -8.14		this study
jsTi1493 IV	mosL loxP mex-5p FLP sl2 mNeonGreen rpl-28 FRT GFP-HIs-58 FRT3 mosR	miniMos insertion of plasmid NM3689 on Chr IV : 9,197,338. mu +4.11		this study
jsSi1496 I	phat-5p mCherry V2A GFP-rab-3	RMCE insertion of NM3656 into jsTi1453	jsTi1453 jsSi1496	this study
jsSi1497 I	phat-5p mCherry V2A GFP-rab-3	RMCE insertion of NM3656 into jsTi1453	jsTi1453 jsSi1497	this study
jsSi1500 I	rab-3p CaTevP	RMCE insertion of NM3693 into jsTi1453	jsTi1453 jsSi1500	this study
jsSi1501 I	rab-3p CaTevP	RMCE insertion of NM3693 into jsTi1453	jsTi1453 jsSi1501	this study
jsSi1502 IV	mec-4p GFP-C1 tbb-2 3' UTR	RMCE insertion of NM3732 into jsTi1493	jsTi1493 jsSi1502	this study
js1503 II	deletion derived during heat shock excision of insertion of Rol RMCE plasmid	from RMCE insertion of NM3724 into jsTi1492		this study
jsSi1504 II	QUAS 5X ∆pes-10 GFP-C1 tbb-2 3' UTR	RMCE insertion of NM3726 into jsTi1492	jsTi1492 jsSi1504	this study
jsSi1505 IV	Y8A9A.2p rtetR-QF::P2A::mKate::T2A::tetR-pie1	RMCE insertion of NM3713 into jsTi1493	jsTi1493 jsSi1505	this study
jsSi1506 IV	mec-4p QF tbb-2 3' UTR (non-functional)	RMCE insertion of NM3731 into jsTi1493	jsTi1493 jsSi1506	this study
jsSi1507 IV	mec-4p QF tbb-2 3' UTR (non-functional)	RMCE insertion of NM3731 into jsTi1490	jsTi1490 jsSi1507	this study
jsSi1508 IV	tetO 7X ∆pes-10 GFP-C1 tbb-2 3' UTR	RMCE insertion of NM3724 into jsTi1493	jsTi1493 jsSi1508	this study
jsTi1509 III	mosL loxP mex-5p FLP sl2 mNeonGreen rpl-28 FRT GFP-hIs-58 FRT3 mosR	miniMos insertion of plasmid NM3689. Chr III: 13,031,845.		this study
jsTi1510 X	mosL loxP mex-5p FLP sl2 mNeonGreen rpl-28 FRT GFP-hIs-58 FRT3 mosR	miniMos insertion of plasmid NM3689 Chr X: 15,253,021.		this study
jsSi1511 I	QUAS 5X ∆pes-10 GFP-C1 tbb-2 3' UTR	RMCE insertion of NM3726 into jsTi1453	jsTi1453 jsSi1511	this study
jsSi1512 IV	mec-4p rtetR-QF tbb-2 3' UTR (non-functional)	RMCE insertion of NM3741 into jsTi1493	jsTi1493 jsSi1512	this study
jsSi1514 I	mec-4p GFP-C1 tbb-2 3' UTR	RMCE insertion of NM3732 into jsTi1453	jsTi1453 jsSi1514	this study
jsSi1515 IV	mec-4p GAL4-QF tbb-2 3' UTR	RMCE insertion of NM3741 into jsTi1493	jsTi1493 jsSi1515	this study
jsSi1516 IV	mec-4p tetR-QF tbb-2 3' UTR (non-functional)	RMCE insertion of NM3730 into jsTi1490	jsSi1490 jsSi1516	this study
jsSi1517 I	QUAS 5X ∆pes-10 GFP-C1 tbb-2 3' UTR	RMCE insertion of NM3726 into jsTi1453	jsTi1453 jsSi1517	this study
jsSi1518 I	UAS 11X GFP-C1 tbb-2 3' UTR	RMCE insertion of NM3725 into jsTi1453	jsTi1453 jsSi1518	this study
jsSi1519 I	tetO 7X GFP-C1 tbb-2 3' UTR	RMCE insertion of NM3724 into jsTi1453	jsTi1453 jsSi1519	this study
jsSi1520 II	lexO 5X GFP-C1 tbb-2 3' UTR	RMCE insertion of NM3727 into jsTi1492	jsTi1492 jsSi1520	this study
jsSi1521 IV	mec-4p lexA-QF tbb-2 3' UTR (non-functional)	RMCE insertion of NM3726 into jsTi1490	jsTi1490 jsSi1521	this study
jsSi1522 I	AmpR ori	RMCE insertion of NM3708 into jsTi1453	jsTi1453 jsSi152w	this study
jsSi1523 IV	AmpR ori	RMCE insertion of NM3708 into jsTi1493	jsTi1493 jsSi1523	this study
jsSi1524 IV	AmpR ori	RMCE insertion of NM3708 into jsTi1493	jsTi1493 jsSi1523	this study
jsSi1525 IV	mec-4p GAL4-VP64 tbb-2 3' UTR (non-functional)	RMCE insertion of NM3733 into jsTi1493	jsTi1493 jsSi1525	this study
jsSi1526 IV	mec-4p rtetR-QF, tetO 7X ∆pes-10 GFP-C1 tbb-2 3' UTR (non-functional)	RMCE insertion of NM3752 into jsTi1493	jsTi1493 jsSi1526	this study
jsSi1527 I	lexAop 5X GFP-C1 tbb-2 3' UTR	RMCE insertion of NM3727 into jsTi1453	jsTi1453 jsSi1527	this study
jsIs1528 IV	mec-4p GAL4-QF tbb-2 3' UTR	complex RMCE insertion of NM3741 into jsTi1490	jsTi1490 jsIs1528	this study
jsSi1529 IV	mec-4p GFP-C1 tbb-2 3' UTR	RMCE insertion of NM3732 into jsTi1490	jsTi1490 jsSi1529	this study
jsSi1530 I	tetO 7X mCherry tbb-2 3' UTR	RMCE insertion of NM3756 into jsTi1453	jsTi1453 jsSi1530	this study
jsSi1531 IV	mec-4p tetR-QF tbb-2 3' UTR (non-functional)	RMCE insertion of NM3730 into jsTi1493	jsTi1493 jsSi1531	this study
jsSi1532 I	tetO 7X ∆hsp-16.1p GFP-C1 tbb-2 3' UTR	RMCE insertion of NM3776 into jsTi1453	jsTi1453 jsSi1532	this study
jsEx1533	pBS FRT; loxP hygR sqt-1 FRT3; scl-6-emerald; lys-8-cherry	extrachromosomal array containing both FRT and FRT3 sites		this study
jsSi1534 IV	mec-4p tetR-QF tbb-2 3' UTR (non-functional)	RMCE insertion of NM3730 into jsTi1490	jsTi1490 jsSi1534	this study
jsSi1535 II	mec-4p GFP-C1 tbb-2 3' UTR	RMCE insertion of NM3732 into jsTi1492	jsTi1492 jsSi1535	this study
jsSi1536 IV	mec-4p lexA-QF tbb-2 3' UTR (non-functional)	RMCE insertion of NM3726 into jsTi1493	jsTi1493 jsSi1536	this study
jsSi1537 II	tetO 7X GFP-C1 tbb-2 3' UTR	RMCE insertion of NM3725 into jsTi1492	jsTi1492 jsSi1537	this study
jsSi1538 IV	mec-4p rtetR-QF tbb-2 3' UTR (non-functional)	RMCE insertion of NM3741 into jsTi1490	jsTi1490 jsSi1538	this study
jsSi1539 I	tetO 7X GFP-C1 act-4 3' UTR	RMCE insertion of NM3755 into jsTi1453	jsTi1453 jsSi1539	this study
js1540 II	deletion derived during heat shock excision of insertion of Rol RMCE plasmid	from RMCE insertion of NM3724 into jsTi1492		this study
jsSi1541 IV	AmpR ori	RMCE insertion of NM3708 into jsTi1493	jsTi1493 jsSi1541	this study
jsSi1543 I	7X tetO ∆mec-7p GFP-C1 tbb-2 3' UTR	RMCE insertion of NM3774 into jsTi1453	jsSi1453 jsSi1543	this study
jsSi1544 I	7X tetO ∆myo-2p GFP-C1 tbb-2 3' UTR	RMCE insertion of NM3775 into jsTi1453	jsSi1453 jsSi1544	this study
jsSi1548 IV	mec-4p rtetR-L-QF act-4 3' UTR	RMCE insertion of NM3814 into jsTi1493	jsTi1493 jsSi1548	this study
jsSi1549 IV	mec-4p lexA-L-QF act-4 3' UTR	RMCE insertion of NM3813 into jsTi1493	jsTi1493 jsSi1549	this study
jsSi1551 IV	mec-4p QF act-4 3' UTR	RMCE insertion of NM3710 into jsTi1490	jsTi1490 jsSi1551	this study
jsSi1552 II	UAS 11X GFP-C1 tbb-2 3' UTR	RMCE insertion of NM3726 into jsTi1492	jsTi1492 jsSi1552	this study
jsSi1553 IV	mec-4p QF act-4 3' UTR	RMCE insertion of NM3710 into jsTi1493	jsTi1493 jsSi1553	this study
jsSi1554 IV	mec-4p QF2 act-4 3' UTR	RMCE insertion of NM3711 into jsTi1493	jsTi1493 jsSi1554	this study
jsSi1555 IV	mec-4p lexA-L-QF act-4 3' UTR	RMCE insertion of NM3714 into jsTi1490	jsTi1490 jsSi1555	this study
jsSi1560 IV	mec-4p tetR-L-QF act-4 3' UTR	RMCE insesrtion of NM3823 into jsTi1493	jsTi1493 jsSi1560	this study
mIs12 II	myo-2p::GFP; pes-10p::GFP; F22B7.9::GFP	Available at CGC		Huang et al. 2002
syIs336 X	rab-3p::NLS::GAL4SK::VP64::let-858 3'UTR, unc-122p::RFP,pBluescript	Available at CGC		Wang et al. 2017
syIs390	syIs390 [pHW394 [15xUAS::Δpes-10::GFP::let-858 3'UTR), 25ng/µL; Pttx-3::RFP, 50ng/µL; 1kb DNA ladder(NEB), 125ng/µL]	Available at CGC		Wang et al. 2017
wySi374 IV	QUAS::GFP	Integrated at cxTi10882		Wei et al. 2012
wySi377 IV	mig-13p QF::SL2::mCherry	Integrated at cxTi10882		Wei et al. 2012
